# Supplementary material for: Soil Pollution Characteristics and Microbial Responses in a Vertical Profile with Long-Term Tannery Sludge Contamination in Hebei, China
Source: MDPI journal article supplement (doi:10.3390/ijerph16040563), 2019-02-15
Supplement: s1 [file s1]

**Supplementary Materials:** The following are available online at [www.mdpi.com/xxx/s1](http://www.mdpi.com/xxx/s1), Figure S1: Fourier transform infrared spectroscopy of the tannery sludge leachate., Table S1: Particle classification of soils according to the standard of the International Society of Soil Science (ISSS).

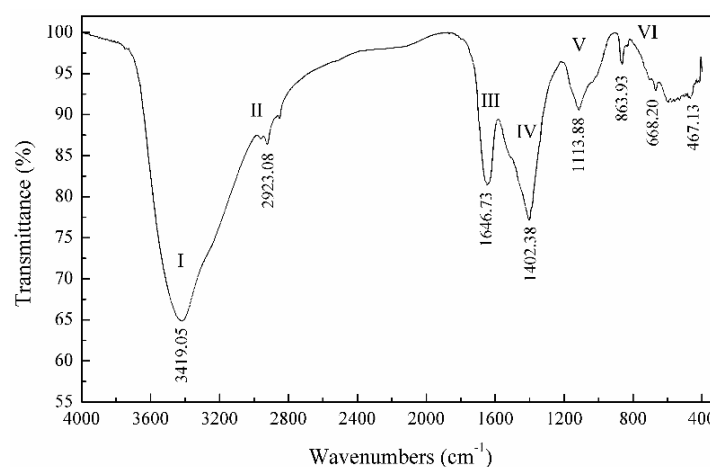

**Figure S1.** Fourier transform infrared spectroscopy of the tannery sludge leachate.

I, scanned area: 3600–3200  $\text{cm}^{-1}$ , the stretching vibration band of O-H and the N-H groups in complexes of carboxylic acid, phenols, and the organic amine; II, scanned area: 3000–2800  $\text{cm}^{-1}$ , the stretching vibration band of  $-\text{CH}_3$ ,  $-\text{CH}_2$ - and  $-\text{C}-\text{H}$ - groups in the aliphatic compounds; III, scanned area: 1700–1635  $\text{cm}^{-1}$ , the stretching vibration band of  $-\text{COOH}$ -, O-H and  $-\text{C}=\text{O}$  groups in complexes of carboxylic acids, amides and ketones; IV, 1450–1360  $\text{cm}^{-1}$ , the stretching vibration band of  $-\text{CH}_3$  and  $-\text{CH}_2$ - in the aliphatics; V 1070–1150  $\text{cm}^{-1}$ , the stretching vibration band of C-O-C in the aliphatics; VI scanned area: 870–640  $\text{cm}^{-1}$ , the stretching vibration band of C-H groups.

**Table S1.** Particle classification of soils according to the standard of the International Society of Soil Science (ISSS).

| Samples | Depth/cm | <0.002 mm/% | 0.002~0.02 mm/% | 0.02~2 mm/% |
|---------|----------|-------------|-----------------|-------------|
| TS      | surface  | 4.83        | 37.83           | 57.34       |
| S1      | 0~20     | 1.17        | 13.76           | 85.07       |
| S2      | 20~40    | 4.76        | 44.32           | 50.92       |
| S3      | 40~60    | 4.61        | 36.99           | 58.40       |
| S4      | 60~80    | 4.27        | 42.38           | 53.35       |
| S5      | 80~100   | 3.49        | 31.61           | 64.90       |
| S6      | 120~150  | 8.28        | 48.95           | 42.77       |
| S7      | 150~180  | 2.43        | 37.28           | 60.29       |
| S8      | 180~200  | 11.64       | 39.37           | 48.99       |
| US1     | 0~20     | 5.01        | 46.48           | 48.51       |
